# Supplementary material for: Cost-Effective Enzyme Optimization and Encapsulation from Bacillus subtilis for Poultry Feed Enrichment
Source: Research Square preprint supplement (doi:10.21203/rs.3.rs-7167781/v1), 2025-08-22
Supplement: Supplementary file 1 [file 768549d317c6e5fef2592177.docx]

**Supplementary Data**

**Supplementary Table 1:** **Optimization of parameters generated through RSM for protease, lipase, cellulase and amylase production**

| **Run order** | **A** | **B** | **C** | **D** | **pH** | **Temperature (°C)** | **Incubation time (hrs)** | **Inoculum size (mL)** | **Protease Activity (IU/mL)** | **Lipase Activity (IU/mL)** | **Cellulase Activity (IU/mL)** | **Amylase Activity (IU/mL)** |
| --- | --- | --- | --- | --- | --- | --- | --- | --- | --- | --- | --- | --- |
| 1 | 0 | 1 | -1 | 0 | 7 | 55 | 24 | 3 | 231.11 | 12.66 | 0.023 | 1.951 |
| 2 | 0 | -1 | 0 | -1 | 7 | 25 | 48 | 2 | 406.66 | 17.39 | 0.111 | 3.65 |
| 3 | 1 | 0 | 1 | 0 | 8.5 | 40 | 72 | 3 | 493.064 | 18.06 | 0.247 | 3.98 |
| 4 | 1 | 1 | 0 | 0 | 8.5 | 55 | 48 | 3 | 198.63 | 11.67 | 0.041 | 1.883 |
| 5 | 0 | -1 | 0 | 1 | 7 | 24 | 48 | 4 | 415.95 | 18.22 | 0.106 | 4.01 |
| 6 | 0 | 0 | 0 | 0 | 7 | 40 | 48 | 3 | 572.43 | 22.72 | 0.213 | 4.81 |
| 7 | 1 | 0 | 0 | 1 | 8.5 | 40 | 48 | 4 | 377.02 | 16.5 | 0.177 | 2.32 |
| 8 | 0 | 0 | 0 | 0 | 7 | 40 | 48 | 3 | 583.75 | 21.39 | 0.201 | 4.48 |
| 9 | 0 | 1 | 0 | 1 | 7 | 55 | 48 | 4 | 178.49 | 10.09 | 0.051 | 1.939 |
| 10 | 0 | 0 | -1 | 1 | 7 | 40 | 24 | 4 | 165.69 | 12.25 | 0.187 | 1.84 |
| 11 | 0 | 0 | -1 | -1 | 7 | 40 | 24 | 2 | 223.41 | 13.09 | 0.179 | 1.99 |
| 12 | 0 | -1 | -1 | 0 | 7 | 25 | 24 | 3 | 295.57 | 13.58 | 0.059 | 2.25 |
| 13 | -1 | 0 | -1 | 0 | 5.5 | 40 | 24 | 3 | 121.28 | 12.06 | 0.088 | 1.76 |
| 14 | 0 | 1 | 0 | -1 | 7 | 55 | 48 | 2 | 206.82 | 9.55 | 0.053 | 1.91 |
| 15 | 1 | 0 | 0 | -1 | 8.5 | 40 | 48 | 2 | 370.72 | 17.80 | 0.205 | 2.99 |
| 16 | 0 | 0 | 0 | 0 | 7 | 40 | 48 | 3 | 551.01 | 26.42 | 0.201 | 4.29 |
| 17 | 0 | -1 | 1 | 0 | 7 | 25 | 72 | 3 | 650.38 | 23.57 | 0.154 | 4.78 |
| 18 | -1 | -1 | 0 | 0 | 5.5 | 25 | 48 | 3 | 170.16 | 11.02 | 0.028 | 1.19 |
| 19 | 1 | -1 | 0 | 0 | 8.5 | 25 | 48 | 3 | 633.49 | 25.25 | 0.017 | 4.95 |
| 20 | 0 | 1 | 1 | 0 | 7 | 55 | 72 | 3 | 202.08 | 14.16 | 0.014 | 1.07 |
| 21 | -1 | 1 | 0 | 0 | 5.5 | 55 | 48 | 3 | 294.25 | 15.03 | 0.023 | 1.13 |
| 22 | -1 | 0 | 1 | 0 | 5.5 | 40 | 72 | 3 | 185.28 | 18.36 | 0.017 | 1.82 |
| 23 | -1 | 0 | 0 | 1 | 5.5 | 40 | 48 | 4 | 167.8 | 17.56 | 0.141 | 1.69 |
| 24 | 0 | 0 | 0 | 0 | 7 | 40 | 48 | 3 | 585.89 | 24.77 | 0.201 | 4.76 |
| 25 | 1 | 0 | -1 | 0 | 8.5 | 40 | 24 | 3 | 293.89 | 19.18 | 0.164 | 2.29 |
| 26 | -1 | 0 | 0 | -1 | 5.5 | 40 | 48 | 2 | 175.08 | 14.75 | 0.144 | 1.43 |
| 27 | 0 | 0 | 1 | -1 | 7 | 40 | 72 | 2 | 353.04 | 17.59 | 0.263 | 2.97 |
| 28 | 0 | 0 | 1 | 1 | 7 | 40 | 72 | 4 | 366.86 | 18.73 | 0.233 | 3.09 |
| 29 | 0 | 0 | 0 | 0 | 7 | 40 | 48 | 3 | 587.39 | 23.69 | 0.21 | 4.14 |

A= pH, B= temperature, C= incubation time, D= inoculum size

**Supplementary Table 2: ANOVA table generated through RSM for protease production**

| **Source** | **Sum of**  **Squares** | **df** | **Mean**  **Square** | **F**  **Value** | **p-value**  **Prob > F** |  |
| --- | --- | --- | --- | --- | --- | --- |
| **Model** | 509.0051 | 14 | 36.35751 | 8.554822 | < 0.0001 | Significant |
| **A-pH** | 57.82232 | 1 | 57.82232 | 13.60543 | 0.0022 |  |
| **B-Temp** | 134.1606 | 1 | 134.1606 | 31.56761 | < 0.0001 |  |
| **C-Incubation Time** | 38.85818 | 1 | 38.85818 | 9.143222 | 0.0085 |  |
| **D-Inculumn size** | 3.946558 | 1 | 3.946558 | 0.928614 | 0.3505 |  |
| **AB** | 48.6056 | 1 | 48.6056 | 11.43676 | 0.0041 |  |
| **AC** | 0.066956 | 1 | 0.066956 | 0.015755 | 0.9018 |  |
| **AD** | 5.098519 | 1 | 5.098519 | 1.199668 | 0.2907 |  |
| **BC** | 32.23743 | 1 | 32.23743 | 7.585378 | 0.0148 |  |
| **BD** | 1.692477 | 1 | 1.692477 | 0.398235 | 0.5375 |  |
| **CD** | 3.508406 | 1 | 3.508406 | 0.825518 | 0.3779 |  |
| **A^2** | 90.15083 | 1 | 90.15083 | 21.21224 | 0.0003 |  |
| **B^2** | 33.39363 | 1 | 33.39363 | 7.857429 | 0.0134 |  |
| **C^2** | 62.93494 | 1 | 62.93494 | 14.80842 | 0.0016 |  |
| **D^2** | 54.19393 | 1 | 54.19393 | 12.75168 | 0.0028 |  |
| **Residual** | 63.74915 | 15 | 4.249944 |  |  |  |
| **Lack of Fit** | 63.34277 | 11 | 5.758433 | 56.67917 | 0.0007 | Significant |
| **Pure Error** | 0.406388 | 4 | 0.101597 |  |  |  |
| **Cor Total** | 572.7543 | 29 |  |  |  |  |

**Supplementary Table 3: ANOVA table generated through RSM for the production of lipase**

| **Source** | **Sum of**  **Squares** | **df** | **Mean**  **Square** | **F**  **Value** | **p-value**  **Prob > F** |  |
| --- | --- | --- | --- | --- | --- | --- |
|  |
| **Model** | 7.903552 | 14 | 0.564539 | 4.849348 | 0.0022 | significant |
| **A-pH** | 0.221131 | 1 | 0.221131 | 1.899496 | 0.1883 |  |
| **B-Temp** | 2.755028 | 1 | 2.755028 | 23.66547 | 0.0002 |  |
| **C-Incubation Time** | 1.095112 | 1 | 1.095112 | 9.406926 | 0.0078 |  |
| **D-Inculumn size** | 0.222942 | 1 | 0.222942 | 1.91505 | 0.1867 |  |
| **AB** | 0.914957 | 1 | 0.914957 | 7.859409 | 0.0134 |  |
| **AC** | 0.115226 | 1 | 0.115226 | 0.989783 | 0.3356 |  |
| **AD** | 0.000243 | 1 | 0.000243 | 0.002091 | 0.9641 |  |
| **BC** | 0.186258 | 1 | 0.186258 | 1.599943 | 0.2252 |  |
| **BD** | 0.163151 | 1 | 0.163151 | 1.401457 | 0.2549 |  |
| **CD** | 0.327287 | 1 | 0.327287 | 2.811365 | 0.1143 |  |
| **A^2** | 0.452828 | 1 | 0.452828 | 3.889756 | 0.0673 |  |
| **B^2** | 1.446297 | 1 | 1.446297 | 12.42357 | 0.0031 |  |
| **C^2** | 0.437604 | 1 | 0.437604 | 3.758986 | 0.0716 |  |
| **D^2** | 0.797369 | 1 | 0.797369 | 6.849337 | 0.0194 |  |
| **Residual** | 1.746233 | 15 | 0.116416 |  |  |  |
| **Lack of Fit** | 1.677261 | 11 | 0.152478 | 8.842944 | 0.0247 | significant |
| **Pure Error** | 0.068972 | 4 | 0.017243 |  |  |  |
| **Cor Total** | 9.649785 | 29 |  |  |  |  |

**Supplementary Table 4: ANOVA table generated through RSM for the production of cellulase**

| **Source** | **Sum of Squares** | **df** | **Mean Square** | **F Value** | **p-value Prob > F** |  |
| --- | --- | --- | --- | --- | --- | --- |
| **Model** | 0.383883 | 14 | 0.02742 | 3.117416 | 0.0182 | significant |
| **A-pH** | 0.009607 | 1 | 0.009607 | 1.092217 | 0.3125 |  |
| **B-Temp** | 0.125175 | 1 | 0.125175 | 14.23117 | 0.0018 |  |
| **C-Incubation Time** | 0.000631 | 1 | 0.000631 | 0.071684 | 0.7925 |  |
| **D-Inculumn size** | 0.000235 | 1 | 0.000235 | 0.026735 | 0.8723 |  |
| **AB** | 0.000382 | 1 | 0.000382 | 0.043477 | 0.8376 |  |
| **AC** | 0.016678 | 1 | 0.016678 | 1.896114 | 0.1887 |  |
| **AD** | 0.000197 | 1 | 0.000197 | 0.022414 | 0.8830 |  |
| **BC** | 0.00836 | 1 | 0.00836 | 0.950441 | 0.3451 |  |
| **BD** | 0.000159 | 1 | 0.000159 | 0.018129 | 0.8947 |  |
| **CD** | 0.00039 | 1 | 0.00039 | 0.044314 | 0.8361 |  |
| **A^2** | 0.018305 | 1 | 0.018305 | 2.081104 | 0.1697 |  |
| **B^2** | 0.297768 | 1 | 0.297768 | 33.85333 | < 0.0001 |  |
| **C^2** | 0.00986 | 1 | 0.00986 | 1.120952 | 0.3065 |  |
| **D^2** | 0.005159 | 1 | 0.005159 | 0.586528 | 0.4556 |  |
| **Residual** | 0.131937 | 15 | 0.008796 |  |  |  |
| **Lack of Fit** | 0.131772 | 11 | 0.011979 | 289.3037 | < 0.0001 | significant |
| **Pure Error** | 0.000166 | 4 | 4.14E-05 |  |  |  |
| **Cor Total** | 0.515821 | 29 |  |  |  |  |

**Supplementary Table 5: ANOVA table generated through RSM for amylase production**

|  | **Sum of**  **Squares** | **df** | **Mean**  **Square** | **F**  **Value** | **p-value**  **Prob > F** |  |
| --- | --- | --- | --- | --- | --- | --- |
| **Source** |  |
| **Model** | 3.706423 | 14 | 0.264745 | 10.21403 | < 0.0001 | significant |
| **A-pH** | 0.527968 | 1 | 0.527968 | 20.36938 | 0.0004 |  |
| **B-Temp** | 1.265386 | 1 | 1.265386 | 48.81949 | < 0.0001 |  |
| **C-Incubation Time** | 0.079688 | 1 | 0.079688 | 3.074408 | 0.0999 |  |
| **D-Inculumn size** | 0.000258 | 1 | 0.000258 | 0.009966 | 0.9218 |  |
| **AB** | 0.170065 | 1 | 0.170065 | 6.561225 | 0.0217 |  |
| **AC** | 0.052738 | 1 | 0.052738 | 2.034672 | 0.1742 |  |
| **AD** | 0.024053 | 1 | 0.024053 | 0.927984 | 0.3507 |  |
| **BC** | 0.27494 | 1 | 0.27494 | 10.6074 | 0.0053 |  |
| **BD** | 0.002604 | 1 | 0.002604 | 0.100477 | 0.7556 |  |
| **CD** | 0.001966 | 1 | 0.001966 | 0.075848 | 0.7868 |  |
| **A^2** | 0.794396 | 1 | 0.794396 | 30.64838 | < 0.0001 |  |
| **B^2** | 0.368307 | 1 | 0.368307 | 14.20953 | 0.0019 |  |
| **C^2** | 0.369568 | 1 | 0.369568 | 14.2582 | 0.0018 |  |
| **D^2** | 0.315453 | 1 | 0.315453 | 12.17042 | 0.0033 |  |
| **Residual** | 0.388795 | 15 | 0.02592 |  |  |  |
| **Lack of Fit** | 0.371244 | 11 | 0.033749 | 7.691667 | 0.0318 | Significant |
| **Pure Error** | 0.017551 | 4 | 0.004388 |  |  |  |
| **Cor Total** | 4.095219 | 29 |  |  |  |  |

**Supplementary Table 6: Regression analysis values for model**

| **Enzyme** | **R-Squared** | **Adj R-Squared** | **Pred R-Squared** | **Adeq Precision** |
| --- | --- | --- | --- | --- |
| Protease | 0.888697 | 0.784815 | 0.10396 | 10.4017 |
| Lipase | 0.819039 | 0.650142 | -0.38342 | 7.198468 |
| Cellulase | 0.744219 | 0.505489 | -0.04301 | 5.369823 |
| Amylase | 0.905061 | 0.816452 | 0.660556 | 9.70737 |

**Supplementary Table 7: Coded coefficients for proteases production**

| **Factor** | **Coefficient**  **Estimate** | **df** | **Standard**  **Error** | **95% CI**  **Low** | **95% CI**  **High** | **VIF** |
| --- | --- | --- | --- | --- | --- | --- |
| **Intercept** | 22.30393 | 1 | 0.849145 | 20.49402 | 24.11384 |  |
| **A-pH** | 1.521189 | 1 | 0.412408 | 0.642162 | 2.400215 | 1.119209 |
| **B-Temp** | -3.06162 | 1 | 0.544917 | -4.22308 | -1.90016 | 1.264091 |
| **C-Incubation Time** | 1.867501 | 1 | 0.617606 | 0.551106 | 3.183896 | 1.163771 |
| **D-Inculumn size** | -1.18122 | 1 | 1.225777 | -3.7939 | 1.431467 | 1.40238 |
| **AB** | -1.92842 | 1 | 0.570231 | -3.14384 | -0.71301 | 1.148162 |
| **AC** | 0.085431 | 1 | 0.680633 | -1.3653 | 1.536166 | 1.086407 |
| **AD** | 1.447108 | 1 | 1.321206 | -1.36898 | 4.263191 | 1.321185 |
| **BC** | -2.34321 | 1 | 0.850791 | -4.15663 | -0.52979 | 1.227431 |
| **BD** | 1.024817 | 1 | 1.623965 | -2.43658 | 4.486216 | 1.605264 |
| **CD** | -1.70576 | 1 | 1.877389 | -5.70732 | 2.295801 | 1.631008 |
| **A^2** | -1.64361 | 1 | 0.356866 | -2.40425 | -0.88297 | 1.067286 |
| **B^2** | -1.54233 | 1 | 0.55022 | -2.71509 | -0.36956 | 1.291875 |
| **C^2** | -3.05039 | 1 | 0.792686 | -4.73996 | -1.36082 | 1.089157 |
| **D^2** | -9.20125 | 1 | 2.576697 | -14.6934 | -3.70916 | 1.900707 |

**Supplementary Table 8: Coded coefficients for lipase production**

|  | **Coefficient** | | **Standard** | **95% CI** | **95% CI** |  |
| --- | --- | --- | --- | --- | --- | --- |
| Factor | Estimate | df | Error | Low | High | VIF |
| Intercept | 4.563619 | 1 | 0.140695 | 4.263733 | 4.863504 |  |
| A-pH | 0.093664 | 1 | 0.06796 | -0.05119 | 0.238517 | 1.109518 |
| B-Temp | -0.43119 | 1 | 0.088636 | -0.62012 | -0.24227 | 1.273904 |
| C-Incubation Time | 0.310429 | 1 | 0.101214 | 0.094698 | 0.526161 | 1.141023 |
| D-Inculumn size | 0.269369 | 1 | 0.194651 | -0.14552 | 0.684259 | 1.291011 |
| AB | -0.26354 | 1 | 0.094005 | -0.46391 | -0.06317 | 1.139139 |
| AC | -0.11223 | 1 | 0.112806 | -0.35267 | 0.128212 | 1.089444 |
| AD | 0.010059 | 1 | 0.219961 | -0.45878 | 0.478896 | 1.336868 |
| BC | -0.17651 | 1 | 0.139547 | -0.47395 | 0.120926 | 1.205493 |
| BD | 0.305606 | 1 | 0.25815 | -0.24463 | 0.85584 | 1.480844 |
| CD | 0.528683 | 1 | 0.315309 | -0.14338 | 1.200748 | 1.679549 |
| A^2 | -0.11641 | 1 | 0.059022 | -0.24221 | 0.009396 | 1.065785 |
| B^2 | -0.31675 | 1 | 0.089867 | -0.5083 | -0.12521 | 1.258109 |
| C^2 | -0.25439 | 1 | 0.131207 | -0.53405 | 0.025276 | 1.089364 |
| D^2 | -1.14578 | 1 | 0.437801 | -2.07893 | -0.21263 | 2.00315 |

**Supplementary Table 9: Coded coefficients for cellulase production**

|  | **Coefficient** | | **Standard** | **95% CI** | **95% CI** |  |
| --- | --- | --- | --- | --- | --- | --- |
| Factor | Estimate | df | Error | Low | High | VIF |
| Intercept | 0.443924 | 1 | 0.041546 | 0.355371 | 0.532477 |  |
| A-pH | 0.018546 | 1 | 0.017746 | -0.01928 | 0.056371 | 1.105147 |
| B-Temp | -0.09353 | 1 | 0.024793 | -0.14638 | -0.04069 | 1.224281 |
| C-Incubation Time | 0.007545 | 1 | 0.028179 | -0.05252 | 0.067607 | 1.083333 |
| D-Inculumn size | -0.00923 | 1 | 0.056429 | -0.1295 | 0.11105 | 1.086066 |
| AB | 0.00541 | 1 | 0.025944 | -0.04989 | 0.060707 | 1.074362 |
| AC | 0.043048 | 1 | 0.031262 | -0.02359 | 0.109681 | 1 |
| AD | -0.00936 | 1 | 0.062524 | -0.14263 | 0.123906 | 1 |
| BC | -0.0381 | 1 | 0.039078 | -0.12139 | 0.045195 | 1.083333 |
| BD | -0.01036 | 1 | 0.07691 | -0.17428 | 0.153573 | 1.087779 |
| CD | -0.01974 | 1 | 0.093786 | -0.21964 | 0.180157 | 1 |
| A^2 | -0.02201 | 1 | 0.015256 | -0.05453 | 0.010509 | 1.183234 |
| B^2 | -0.14649 | 1 | 0.025178 | -0.20016 | -0.09283 | 1.327069 |
| C^2 | -0.03884 | 1 | 0.036684 | -0.11703 | 0.039351 | 1.101548 |
| D^2 | 0.112047 | 1 | 0.146303 | -0.19979 | 0.423885 | 1.095077 |

**Supplementary Table 10: Coded coefficients for amylase production**

|  | **Coefficient** | | **Standard** | **95% CI** | **95% CI** |  |
| --- | --- | --- | --- | --- | --- | --- |
| Factor | Estimate | df | Error | Low | High | VIF |
| Intercept | 1.9868 | 1 | 0.065242 | 1.84774 | 2.12586 |  |
| A-pH | 0.145547 | 1 | 0.032249 | 0.07681 | 0.214284 | 1.083333 |
| B-Temp | -0.29695 | 1 | 0.042499 | -0.38753 | -0.20636 | 1.220715 |
| C-Incubation Time | 0.084818 | 1 | 0.048373 | -0.01829 | 0.187923 | 1.083333 |
| D-Inculumn size | -0.00967 | 1 | 0.096868 | -0.21614 | 0.196799 | 1.086063 |
| AB | -0.11455 | 1 | 0.044721 | -0.20987 | -0.01923 | 1.083333 |
| AC | 0.076549 | 1 | 0.053665 | -0.03784 | 0.190934 | 1 |
| AD | -0.10339 | 1 | 0.107331 | -0.33216 | 0.125376 | 1 |
| BC | -0.21848 | 1 | 0.067082 | -0.36146 | -0.0755 | 1.083333 |
| BD | -0.04185 | 1 | 0.132024 | -0.32325 | 0.239553 | 1.087756 |
| CD | 0.044339 | 1 | 0.160996 | -0.29882 | 0.387494 | 1 |
| A^2 | -0.15146 | 1 | 0.027358 | -0.20977 | -0.09314 | 1.052532 |
| B^2 | -0.15947 | 1 | 0.042305 | -0.24964 | -0.0693 | 1.271435 |
| C^2 | -0.23243 | 1 | 0.061555 | -0.36364 | -0.10123 | 1.052532 |
| D^2 | -0.85701 | 1 | 0.245658 | -1.38061 | -0.3334 | 1.047721 |
